# Supplementary material for: Oncogenic K-Ras decouples glucose and glutamine metabolism to support cancer cell growth
Source: PubMed Central journal article supplement — Mol Syst Biol. 2011 Aug 16;7:523. doi: 10.1038/msb.2011.56 (PMC3202795; doi:10.1038/msb.2011.56), 2011-08-16
Supplement: msb201156-s1.pdf [file msb201156-s1.pdf]

## **Supplementary information for Oncogenic K-Ras decouples glucose and glutamine metabolism to support cancer cell growth**

Daniela Gaglio<sup>1,2\*</sup>, Christian M. Metallo<sup>2\*</sup>, Paulo A. Gameiro<sup>2</sup>, Karsten Hiller<sup>2</sup>, Lara Sala Danna<sup>1</sup>, Chiara Balestrieri<sup>1</sup>, Lilia Alberghina<sup>1§</sup>, Gregory Stephanopoulos<sup>2§</sup> and Ferdinando Chiaradonna<sup>1</sup>.

1 Department of Biotechnology and Biosciences, University of Milano-Bicocca, Piazza della Scienza 2, 20126 Milan, Italy.

2 Department of Chemical Engineering, Massachusetts Institute of Technology, Building 56 Room 469C, 77 Massachusetts Ave, Cambridge, MA 02139, United States.

\* These authors equally contributed to the work

§ Corresponding authors:

Gregory Stephanopoulos

Dept. of Chemical Engineering, Massachusetts Institute of Technology, Cambridge, MA 02139. Tel.: 617-258-0398;

Fax: 617-253-3122; E-mail address: [gregstep@mit.edu](mailto:gregstep@mit.edu)

Lilia Alberghina

Dept. of Biotechnology and Biosciences, University of Milano-Bicocca, Milan 20126. Tel.: +39 02 64483515, fax:

+39 02 64483519. E-mail address: [lilia.alberghina@unimib.it](mailto:lilia.alberghina@unimib.it).

## **Contents**

List of abbreviations

- Cell name abbreviations
- Gene name abbreviations
- Metabolites abbreviations

Supplementary Materials and Methods

- Metabolic flux analysis (MFA): description and assumptions

Supplementary Figures S1-S11 with Legends

Supplementary Table S1-S4

Supplementary References

## List of abbreviations

### - Cell name abbreviations

N, NIH3T3 cells (normal); T, NIH3T3 K-Ras (transformed); R, NIH3T3-GEF-DN (reverted).

### - Gene name abbreviations

*Acly*, ATP citrate lyase; *Aco2*, Aconitase 2; *Ada*, Adenosine deaminase; *Adsl*, Adenylosuccinate lyase; *Adss*, Adenylosuccinate synthetase; *Anpep*, Alanyl (membrane) aminopeptidase; *Aprt*, Adenine phosphoribosyl transferase; *Atic*, 5-aminoimidazole-4-carboxamide ribonucleotide formyltransferase; *Cad*, Carbamoyl-phosphate synthetase (aspartate transcarbamylase); *Cs*, Citrate synthase; *Enpp1* and *Enpp3*, Ectonucleotide pyrophosphatase 1 and 3; *Fh*, Fumarate hydratase; *Gart*, Phosphoribosylglycinamide formyltransferase; *Gclc*, Glutamate-cysteine ligase -catalytic subunit-; *Gclm*, Glutamate-cysteine ligase; *Gfpt1*, Glucosamine-fructose-6-phosphate aminotransferase 1; *Ggta1*, Glycoprotein galactosyltransferase  $\alpha$ ; *Gmps*, Guanine monophosphate synthetase; *Got1* and *Got2*, Glutamate oxaloacetate transaminase 1 and 2; *Gpt*, Glutamic pyruvic transaminase; *Gls*, Glutaminase; *Glud1*, Glutamate dehydrogenase 1; *Gsr*, Glutathione reductase; *Gss*, Glutathione synthetase; *Gstm1,2,5,7*, Glutathione S-transferase mu 1,2,5,7; *Idh*, Isocitrate dehydrogenase (*Idh1*, *Idh2*, *Idh3a*, *Idh3b* and *Idh3g*); *Impdh1* and *2*, Inosine 5'-phosphate dehydrogenase 1 and 2; *Mdh* (*Mdh2*), Malate; *Mgst1*, 2, 3, Microsomal glutathione S-transferase 1,2,3; *Nt5c*, 5',3'-nucleotidase-cytosolic-; *Ogdh*,  $\alpha$ -ketoglutarate dehydrogenase; *Paics*, Phosphoribosylaminoimidazole carboxylase; *Pfas*, Phosphoribosylformylglycinamide synthase; *Ppat*, Phosphoribosyl pyrophosphate amidotransferase; *Prps1* and *2*, Phosphoribosyl pyrophosphate synthetase 1 and 2; *Sdh* (*Sdha*, *Sdhc* and *Sdhd*), Succinate dehydrogenase complex; *Slc1a5*, solute carrier family 1 (neutral amino acid transporter), member 5; *Srm*, Spermidine synthase; *Sucla2*, succinate-coenzyme A ligase-ADP forming-2 and *Sucgl1*, succinate-coenzyme A ligase-GDP forming-2; *Xdh*, Xanthine dehydrogenase.

### - Metabolites abbreviations

Glc, glucose; G6P, glucose 6-phosphate; GAP, glyceraldehyde 3-phosphate; Pyr, pyruvate; Lac, lactate; AcCoA, acetyl-CoA; Cit, citrate; Isocit, isocitrate; AKG,  $\alpha$ -ketoglutarate; SucCoA, succinyl-CoA; Suc, succinate; Fum, fumarate; Mal, malate; OAA, oxalacetate; Gln, glutamine; Glu, glutamate; 5-oxo, 5-oxoproline; Asp, aspartate; Ala, alanine

## Supplementary Materials and Methods

### - Metabolic flux analysis (MFA): description and assumptions

MFA was conducted using the elementary-metabolite unit (EMU-) based software package Metran as previously described using a [U-<sup>13</sup>C<sub>5</sub>]glutamine tracer (Antoniewicz et al., 2007; Metallo et al., 2009; Noguchi et al., 2009; Young et al., 2008). Flux estimations and confidence intervals are subject to the following assumptions:

1. Cellular metabolism and isotopic labeling are at steady state. Cells were cultured in the presence of [U-<sup>13</sup>C<sub>5</sub>]glutamine for 54 hours. Labeling of glycolytic and TCA cycle intermediates has been demonstrated to be constant after such time (Maier et al., 2008; Munger et al., 2008).
2. All CO<sub>2</sub> used in carboxylation reactions is unlabeled.
3. Protein turnover are negligible relative to glucose and glutamine consumption.
4. Two separate compartments of pyruvate are assumed to exist, with cytosolic pyruvate used to generate lactate and mitochondrial pyruvate used for alanine synthesis. These compartments are exchangeable and required to fit the differential labeling observed in lactate and alanine. The former being primarily glucose derived, and the latter containing more label from glutamine.
5. Fumarate and succinate are symmetric metabolites.
6. Dilution pools of unlabeled succinate and citrate are assumed to exist. These pools do not participate in central carbon metabolism and are accounted for using a dilution flux of unlabeled metabolite. Measurements are comprised of both pools. Isotopic enrichment of succinate pools from tracers is often observed to be decreased in tracer studies. Such effects are hypothesized to be due to intracellular compartmentalization (Chatham et al., 2003). Citrate labeling may be diluted due to turnover of unlabeled fatty acids; this dilution pool contributed to ~10% of the measured pool in normal and transformed cells.
7. The pentose phosphate pathway (PPP) is included in the network. The percentage of glycolytic flux that proceeds through the oxidative PPP branch was estimated using the M0 and M1 labeling of lactate in cells cultured with a 1:1 mixture of [1-<sup>13</sup>C]glucose and [U-<sup>13</sup>C<sub>6</sub>]glucose.
8. Amino acid fluxes to biomass were estimated based on cell growth rate and published values of per cell amino acid abundances in mammalian cells cells, as previously described (Metallo et al., 2009).

Isotopic labeling was quantified in the metabolite ion fragments listed below. In the case of redundant fragment measurements, mass isotopomer distributions (MIDs) were highly reproducible (i.e. within 1-2%). The formulas listed below were used to correct for natural isotope abundance.

GC/MS metabolites and fragments used for isotope quantification are shown in the table below

| Metabolite                                                               | Carbons | Formula       | m/z range |       |
|--------------------------------------------------------------------------|---------|---------------|-----------|-------|
| Ala                                                                      | 23      | C10H26ONSi2   | 232       | - 239 |
| Ala                                                                      | 123     | C11H26O2NSi2  | 260       | - 268 |
| Asp                                                                      | 1234    | C18H40O4NSi3  | 418       | - 428 |
| Cit                                                                      | 123456  | C20H39O6Si3   | 459       | - 470 |
| Cit                                                                      | 123456  | C26H55O7Si4   | 591       | - 602 |
| Gln                                                                      | 12345   | C19H43N2O3Si3 | 431       | - 441 |
| Glu                                                                      | 2345    | C16H36O2NSi2  | 330       | - 340 |
| Glu                                                                      | 12345   | C19H42O4NSi3  | 432       | - 442 |
| Lac                                                                      | 23      | C10H25O2Si2   | 233       | - 240 |
| Lac                                                                      | 123     | C11H25O3Si2   | 261       | - 269 |
| Pyr                                                                      | 123     | C6H12O3NSi    | 174       | - 182 |
| Suc                                                                      | 1234    | C12H25O4Si2   | 289       | - 298 |
| <i>The following measurements were also included for MDA-MB-231 fits</i> |         |               |           |       |
| AKG                                                                      | 12345   | C14H28O5NSi2  | 346       | - 355 |
| Asp                                                                      | 12      | C14H32O2NSi2  | 302       | - 310 |
| Fum                                                                      | 1234    | C12H23O4Si2   | 287       | - 297 |
| Mal                                                                      | 1234    | C18H39O5Si3   | 419       | - 428 |
| Glu                                                                      | 12345   | C17H36NO3Si2  | 358       | - 368 |

Network and carbon atom transitions describing central carbon metabolism for MFA (Table below). Dot suffixes indicate localization to a specific compartment: .x, extracellular; .c, cytosolic; .m, mitochondrial; .d, dilution; .mnt, measurement. Forward arrows ( $\rightarrow$ ) indicate net fluxes and reversible arrows ( $\leftrightarrow$ ) indicate exchange fluxes, or  $\min(\cup_F, \cup_R)$ . Metabolites lacking a suffix are assumed to be equilibrated between compartments.

### **Glycolysis**

Glc.x (abcdef)  $\rightarrow$  G6P (abcdef)  
G6P (abcdef)  $\leftrightarrow$  F6P (abcdef)  
F6P (abcdef)  $\rightarrow$  DHAP (cba) + GAP(def)  
DHAP (abc)  $\leftrightarrow$  GAP (abc)  
GAP (abc)  $\leftrightarrow$  3PG (abc)  
3PG (abc)  $\rightarrow$  Pyr.c (abc)  
Pyr.c (abc)  $\leftrightarrow$  Lac (abc)  
Lac (abc)  $\rightarrow$  Lac.x (abc)

### **Pentose Phosphate Pathway**

G6P (abcdef)  $\rightarrow$  P5P (bcdef) + CO2 (a)  
P5P (abcde) + P5P (fghij)  $\leftrightarrow$  S7P (abfghij) + GAP (cde)  
S7P (abcdefg) + GAP (hij)  $\leftrightarrow$  F6P (abchij) + E4P (defg)  
P5P (abcde) + E4P (fghi)  $\leftrightarrow$  F6P (abfghi) + GAP (cde)

### **Anaplerotic Fluxes**

Pyr.m (abc) + CO2 (d)  $\rightarrow$  Oac (abcd)  
Mal (abcd)  $\leftrightarrow$  Pyr.m (abc) + CO2 (d)  
Glu (abcde)  $\leftrightarrow$  Akg (abcde)  
Oac (abcd) + Glu (efghi)  $\rightarrow$  Asp (abcd) + Akg (efghi)

### **TCA cycle**

---

Pyr.m (abc) → AcCoA.m (bc) + CO<sub>2</sub> (a)  
AcCoA.m (ab) + Oac (cdef) → Cit (fedbac)  
Cit (abcdef) ↔ Akg (abcde) + CO<sub>2</sub> (f)  
Akg (abcde) → Suc (bcde) + CO<sub>2</sub> (a)  
Suc (abcd) ↔ Fum (abcd)  
Fum (abcd) ↔ Mal (abcd)  
Mal (abcd) ↔ Oac (abcd)

### **Amino acids**

---

Pyr.m (abc) + Glu (defgh) → Ala (abc) + Akg (defgh)  
Gln.x (abcde) → Gln (abcde)  
Gln (abcde) → Glu (abcde)  
Glu (abcde) → Glu.x (abcde)

### **Biomass production**

---

Cit (abcdef) → AcCoA.c (ed) + OAA (fcba)  
AcCoA.c (ab) → Fatty acids (ab)  
0.18 Asp + 0.28 Glu + 0.15 Ala + 0.22 Gln → Biomass  
P5P (abcde) → NTP (abcde)

### **Dilution and Mixing Fluxes**

---

Suc.d (abcd) → Suc.mnt (abcd)  
0 Suc (abcd) → Suc.mnt (abcd)  
Cit.d (abcdef) → Cit.mnt (abcdef)  
0 Cit (abcdef) → Cit.mnt (abcdef)  
Pyr.c (abc) ↔ Pyr.m (abc)  
0 Pyr.c (abc) → Pyr.mnt (abc)  
0 Pyr.m (abc) → Pyr.mnt (abc)

---

### **Abbreviations:**

Acetyl coenzyme A, AcCoA;  $\alpha$ -ketoglutarate, AKG; alanine, Ala; aspartate, Asp; citrate, Cit; fumarate, Fum; glutamine, Gln; glutamate, Glu; malate, Mal; oxaloacetate, OAA; lactate, Lac; pyruvate, Pyr, succinate, Suc; palmitate, Palm; glucose, Glc; glucose-6-phosphate, G6P, fructose-6-phosphate, F6P, dihydroxyacetone phosphate, DHAP; glyceraldehyde phosphate, GAP; 3-phosphoglycerate, 3PG; pentose-5-phosphate, P5P; erythrose-4-phosphate, E4P; sedoheptulose-7-phosphate, S7P.

## Supplementary Figures

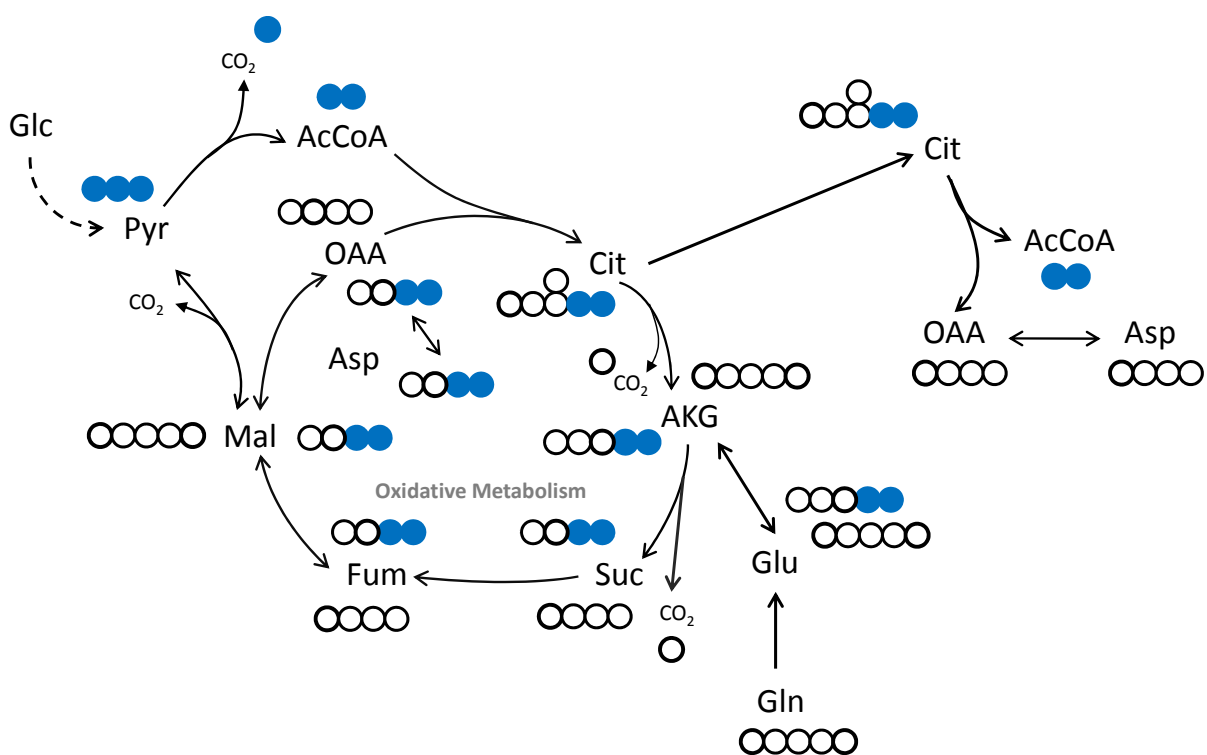

**Figure S1.** Atom transition map depicting labeling patterns of metabolites derived from [U- $^{13}\text{C}_6$ ]glucose in central carbon metabolism. Only one cycle is shown after oxidation of pyruvate. Addition of a labeled AcCoA molecule to unlabeled oxaloacetate generates M2 mass isotopomers, or isotopologues, within the TCA cycle as well as in the glutamate and aspartate pools. Labeling patterns arising from compound symmetry and some unlabeled intermediates are omitted for simplification.

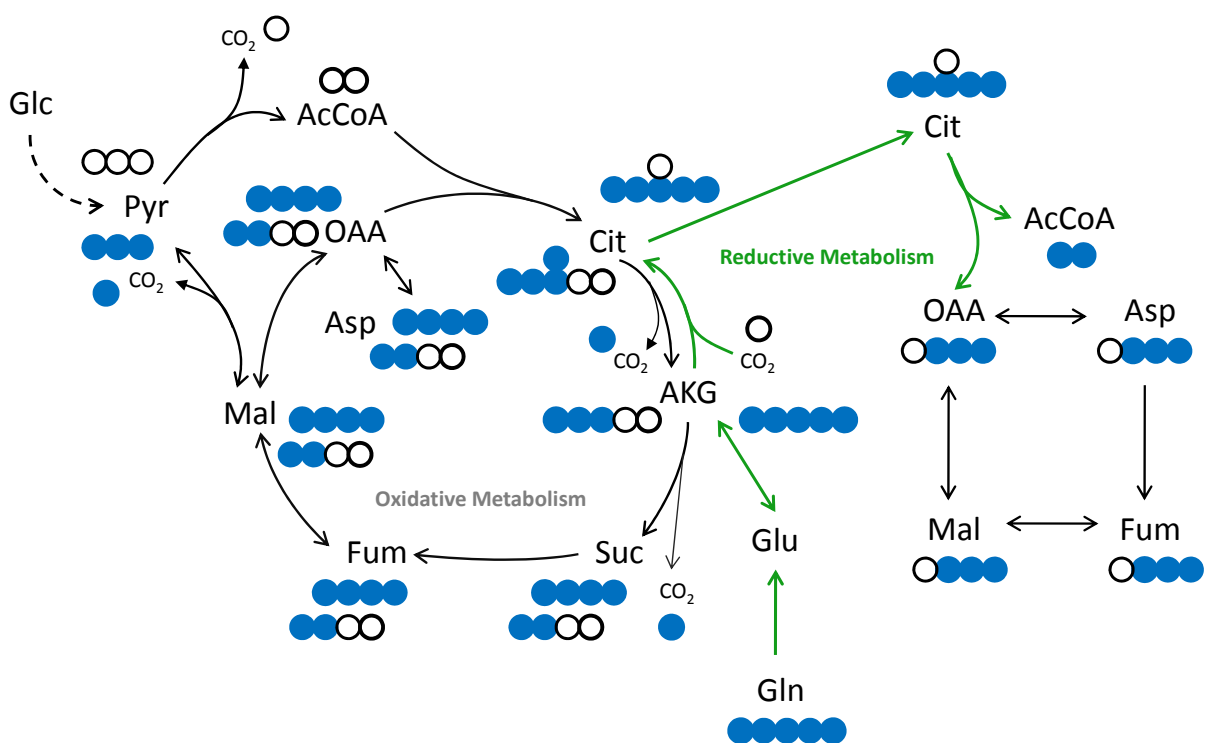

**Figure S2.** Atom transition map depicting labeling patterns of metabolites derived from [U-<sup>13</sup>C<sub>5</sub>]glutamine during oxidative and reductive metabolism. Mass isotopomers, or isotopologues, generated by reductive carboxylation include M5 citrate, M3 aspartate, M3 malate, and M3 fumarate; any mass isotopomers labeled therein provide evidence of reductive pathway activity. Labeling patterns arising from compound symmetry and some unlabeled intermediates are omitted for simplification. For oxidative metabolism, labeling patterns arising from two TCA cycles are shown.



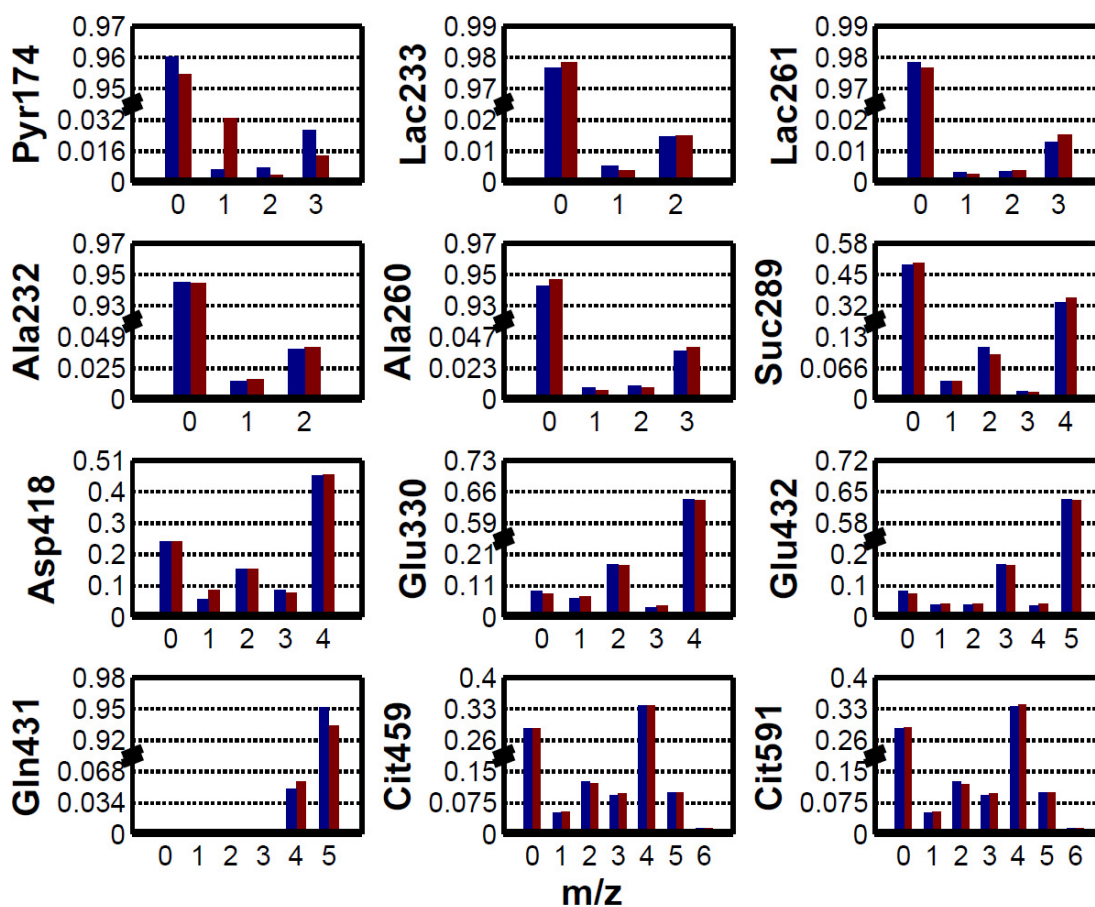

**Figure S3.** Simulated and measured MID values from MFA in normal NIH3T3 cells. Simulated values were obtained using Metran and the model fit (fluxes) listed in Table 1 and Supplementary Table 2. Cells were cultured as described in Methods using [U-<sup>13</sup>C<sub>5</sub>]glutamine and metabolite labeling was quantified via GC/MS. MID values are corrected for natural abundance.

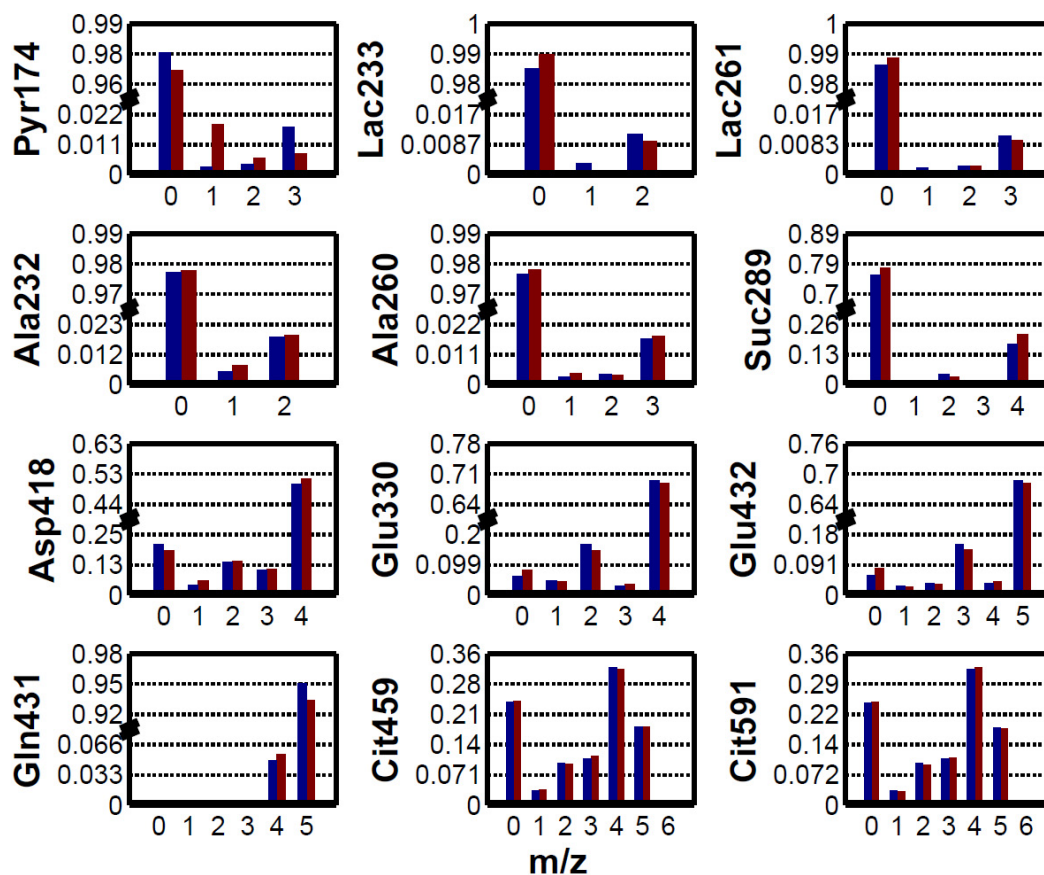

**Figure S4.** Simulated and measured MID values from MFA in transformed NIH3T3 cells expressing oncogenic K-ras. Simulated values were obtained using Metran and the model fit (fluxes) listed in Table 1 and Supplementary Table 2. Cells were cultured as described in Methods using [U-<sup>13</sup>C<sub>5</sub>]glutamine and metabolite labeling was quantified via GC/MS. MID values are corrected for natural abundance.

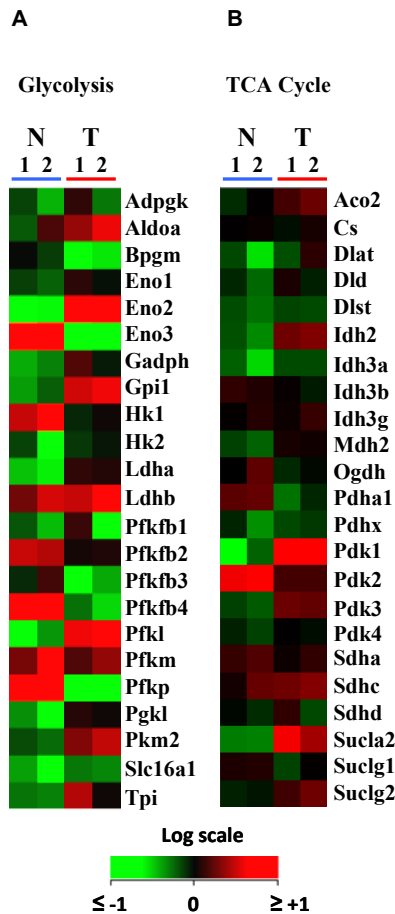

**Figure S5.** Gene expression profiles of relevant metabolic pathways in normal and transformed fibroblasts. Heat maps of glycolytic (**A**) and TCA cycle (**B**) related genes of normal (blue line) and transformed (red line) cell lines grown in 25mM glucose + 4mM glutamine along a time course of 72h are shown. Transcriptional analysis was performed at two different time points (1=48h and 2=72h), corresponding respectively to 48h and 72h after the replacement of initial growth medium with a new medium containing 25mM glucose + 4mM glutamine (time 0h). Color scale bar indicates the normalized expression intensity (log scale), in particular low expression in green, high expression in red and no changed expression in black. Glycolytic genes: Adpgk, ADP-dependent glucokinase; Aldoa, -Aldolase A-; Bpgm, 2,3-Bisphosphoglycerate mutase; Eno1, 2, 3, Enolase 1, 2, 3; Gadph, Glyceraldehyde 3-phosphate dehydrogenase; Gpi, Glucose phosphate isomerase 1; Hk1 and Hk2, Hexokinase 1 and 2; Ldha and Ldhb, Lactate dehydrogenase A and B; Pfkfb1, 2, 3, 4, 6-phosphofructo-2-kinase/fructose-2,6-bisphosphatase 1, 2, 3, 4; Pfk1, Pfkm and Pfkp, Phosphofructokinase liver, muscle and platelet; Pgk1, Phosphoglycerate kinase 1; Pkm2, Pyruvate kinase muscle isoenzyme type 2; Slc16a1, Solute carrier family 16 (monocarboxylic acid transporters), member 1; Tpi1,

Triosephosphate isomerase 1. TCA cycle genes: Aco2, Aconitase 2; Cs, Citrate synthase; Dlat, Dihydrolipoamide S-acetyltransferase (E2 component of pyruvate dehydrogenase complex); Dld, Dihydrolipoamide dehydrogenase; Dlst, Dihydrolipoamide S-succinyltransferase (component of 2-oxo-glutarate complex); Idh2, Isocitrate dehydrogenase 2 (NADP+); Idh3a, Idh3b and Idh3g, Isocitrate dehydrogenase 3 (NAD+)  $\alpha$ ,  $\beta$  and  $\gamma$ ; Mdh2, Malate dehydrogenase 2-NAD-; Ogdh,  $\alpha$ -ketoglutarate dehydrogenase; Sdha, Sdhc and Sdhd, Succinate dehydrogenase complex, subunit A, C and D; Sucla2, Succinate-Coenzyme A ligase-ADP-forming- $\beta$  subunit; Suclg1 and Suclg2, Succinate-CoA ligase-GDP-forming- $\alpha$  and  $\beta$  subunits.

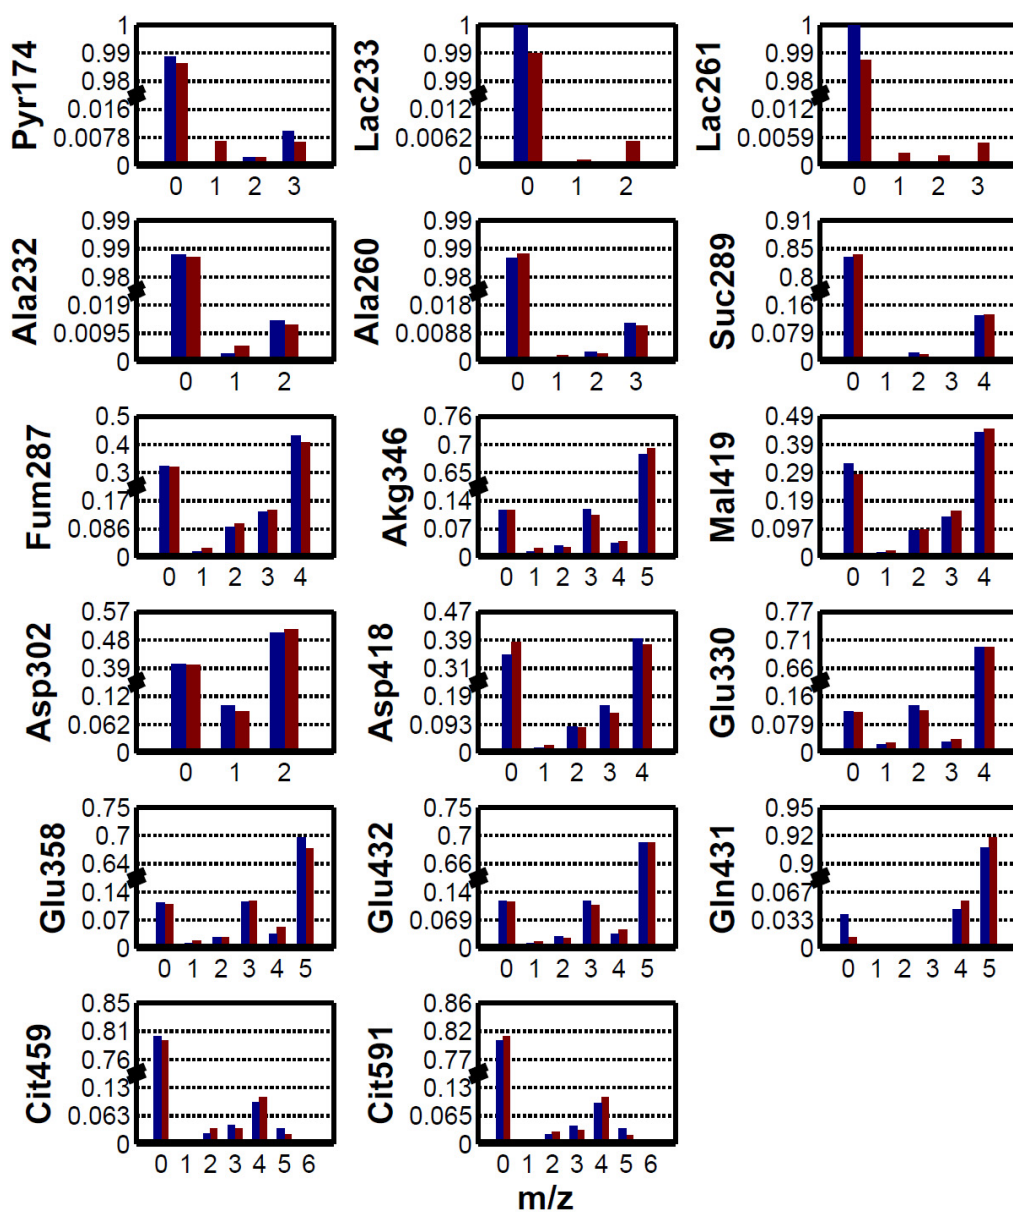

**Figure S6.** Simulated and measured MIDs from MFA in MDA-MB-231 cells. Simulated values were obtained using Metran and the model fit (fluxes) listed in Supplementary Table 4. Cells were cultured as described in Methods using [U-<sup>13</sup>C<sub>5</sub>]glutamine and metabolite labeling was quantified via GC/MS. MIDs are corrected for natural abundance.

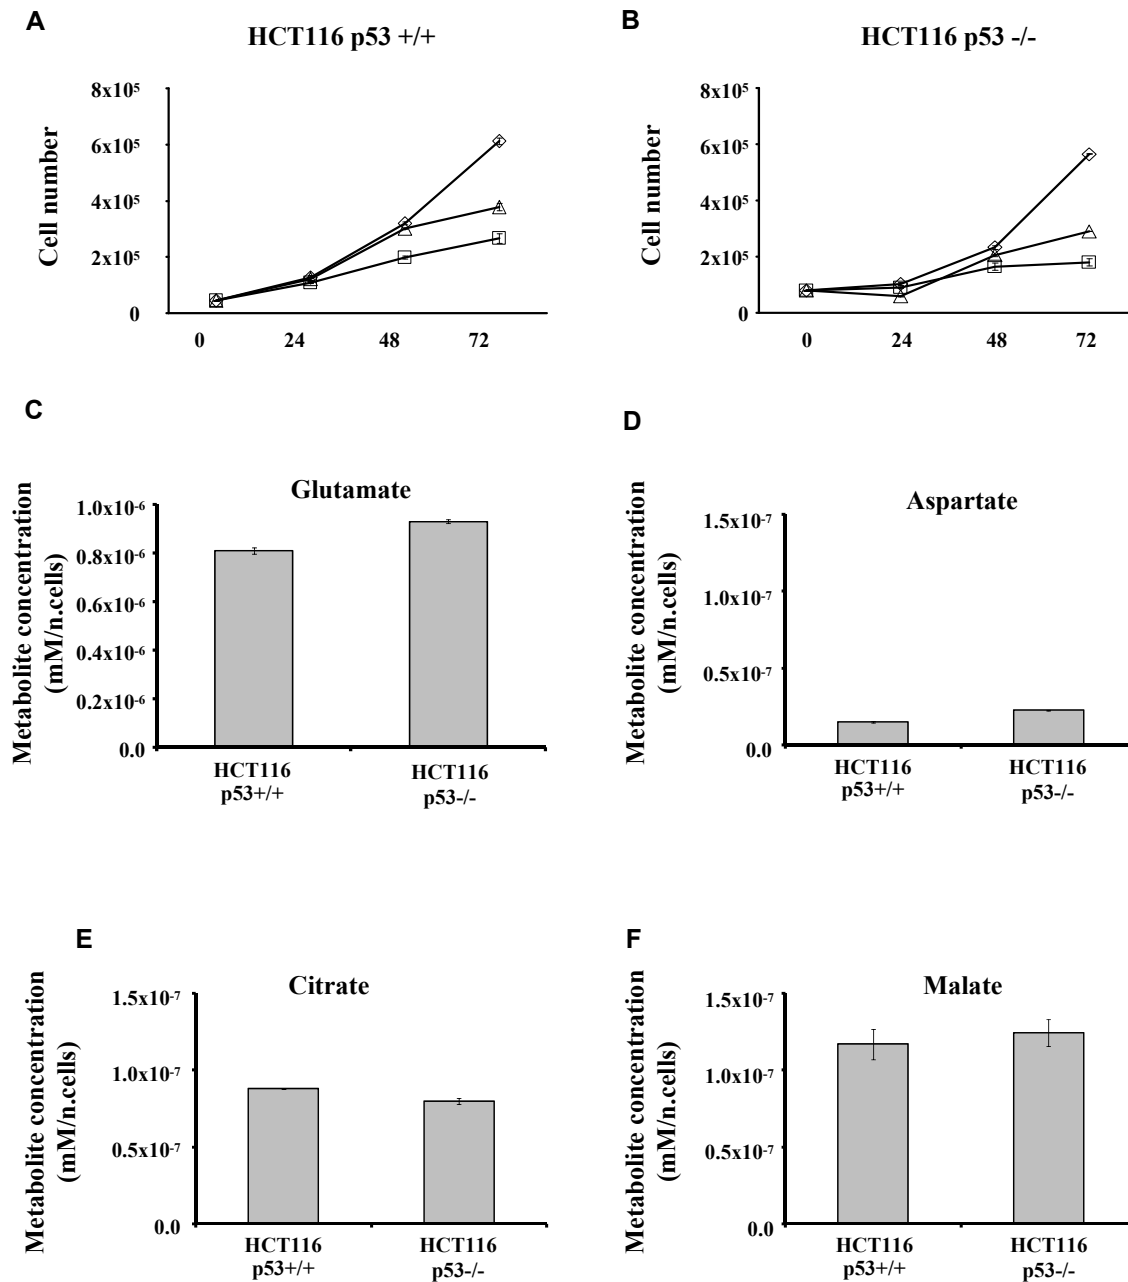

**Figure S7.** Proliferation and metabolic analyses in HCT116 p53<sup>+/+</sup> and HCT116 p53<sup>-/-</sup> human colon cancer cells. HCT116 p53<sup>+/+</sup> (A) and HCT116 p53<sup>-/-</sup> (B) cells were plated at 3000 cells/cm<sup>2</sup> in 6-well plates in normal medium. Culture medium was replaced after 18 hours with normal medium (25mM glucose + 4mM glutamine, ◇), or 1mM glucose + 4mM glutamine (□) or 25mM glucose + 0.5mM glutamine (△) then the cells were collected and counted at indicate time points. Intracellular levels of glutamate (C), aspartate (D), citrate (E) and malate (F) in the two human colon cancer cell lines, HCT116 p53<sup>+/+</sup> and HCT116 p53<sup>-/-</sup>, were measured by appropriate enzymatic assays. The cells for metabolic analyses were collected over 54 hours of growth in normal medium (25mM glucose + 4mM glutamine). Error bars indicate s.e.m. (n=3).

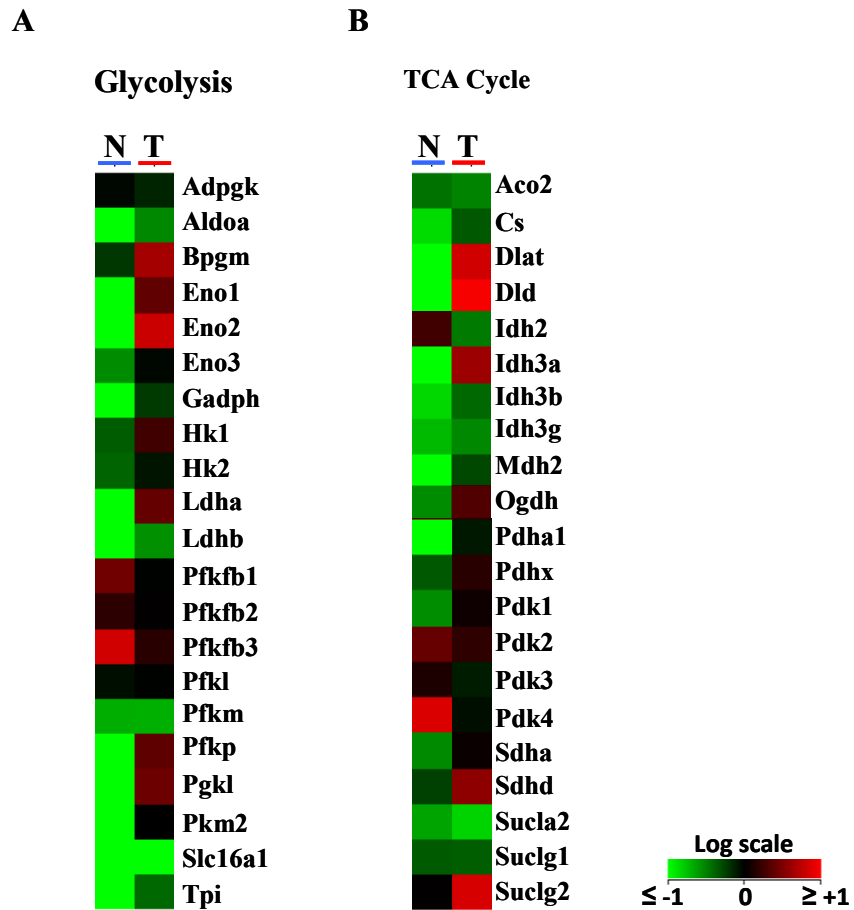

**Figure S8.** Gene expression profiles of relevant metabolic pathways in normal breast tissue and human transformed breast cell line, MDA-MB-231. Heat maps of glycolytic (A) and TCA cycle (B) related genes of breast normal tissue -N- (blue line) and MDA-MB-231 -T- (red line) are shown. Color scale bar indicates the normalized expression intensity (log scale), in particular low expression in green, high expression in red and no changed expression in black.

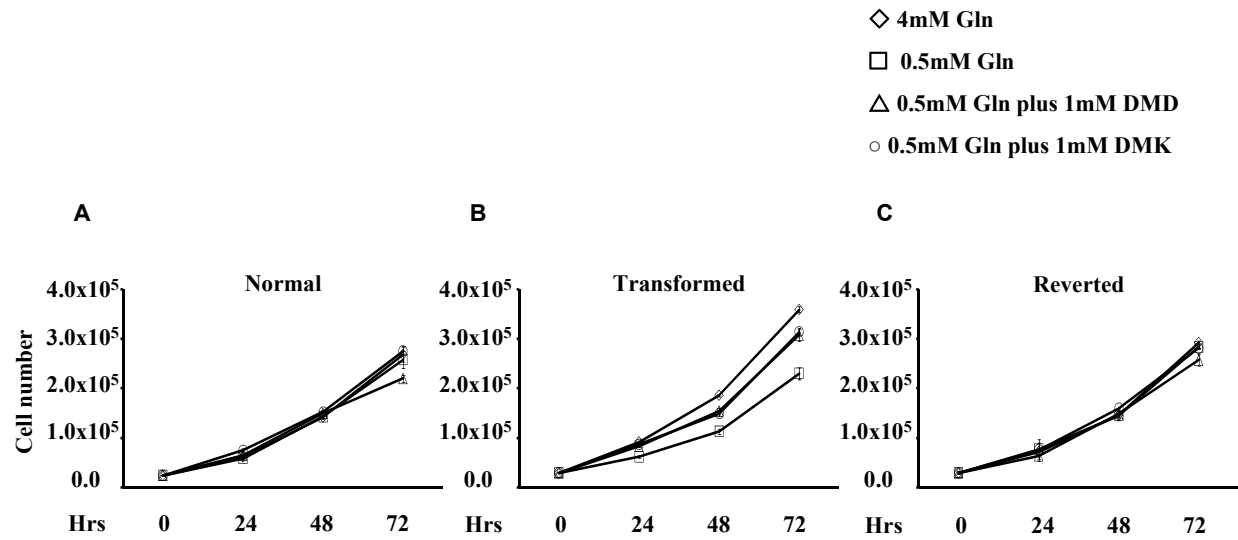

**Figure S9.** Dimethyl aspartate (DMD) and dimethyl  $\alpha$ -ketoglutarate (DMK) sustain proliferation in K-ras transformed fibroblasts. Normal (A), transformed (B) and reverted (C) cell lines were plated at 3000 cells/cm<sup>2</sup> in 6-well plates in normal medium. Culture medium was replaced after 18 hours with a normal medium, 25mM Glc + 4mM Gln (◇), or 25mM Glc + 0.5mM Gln (□), or 25mM Glc + 0.5mM Gln + 1mM DMD (△) and 25mM Glc + 0.5mM Gln + 0.5mM Gln + 2mM DMK (○). The cells were collected and counted at indicate time points Error bars indicate s.e.m. (n=3).



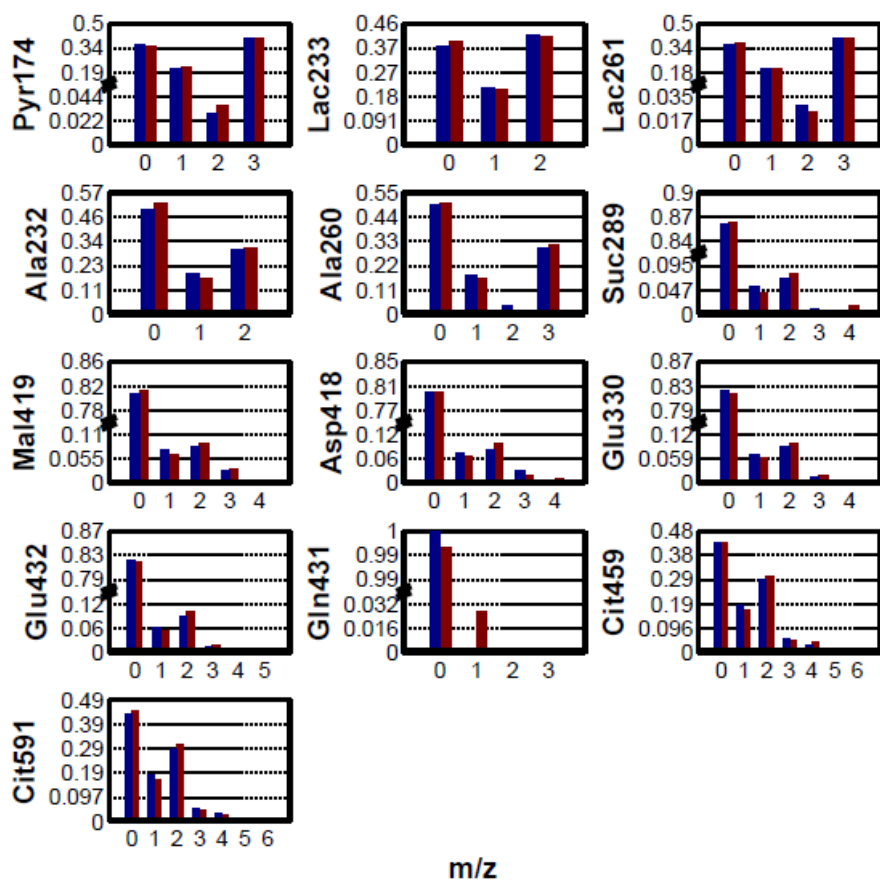

**Figure S10.** Simulated and measured MIDs from MFA in normal NIH3T3 cells. Simulated values were obtained using Metran and the model fit (fluxes) listed in Supplementary Table 3. Cells were cultured as described in Methods using a 1:1 mixture of [U- $^{13}\text{C}_6$ ]glucose and [1- $^{13}\text{C}$ ]glucose. Metabolite labeling was quantified via GC/MS. MIDs are corrected for natural abundance.

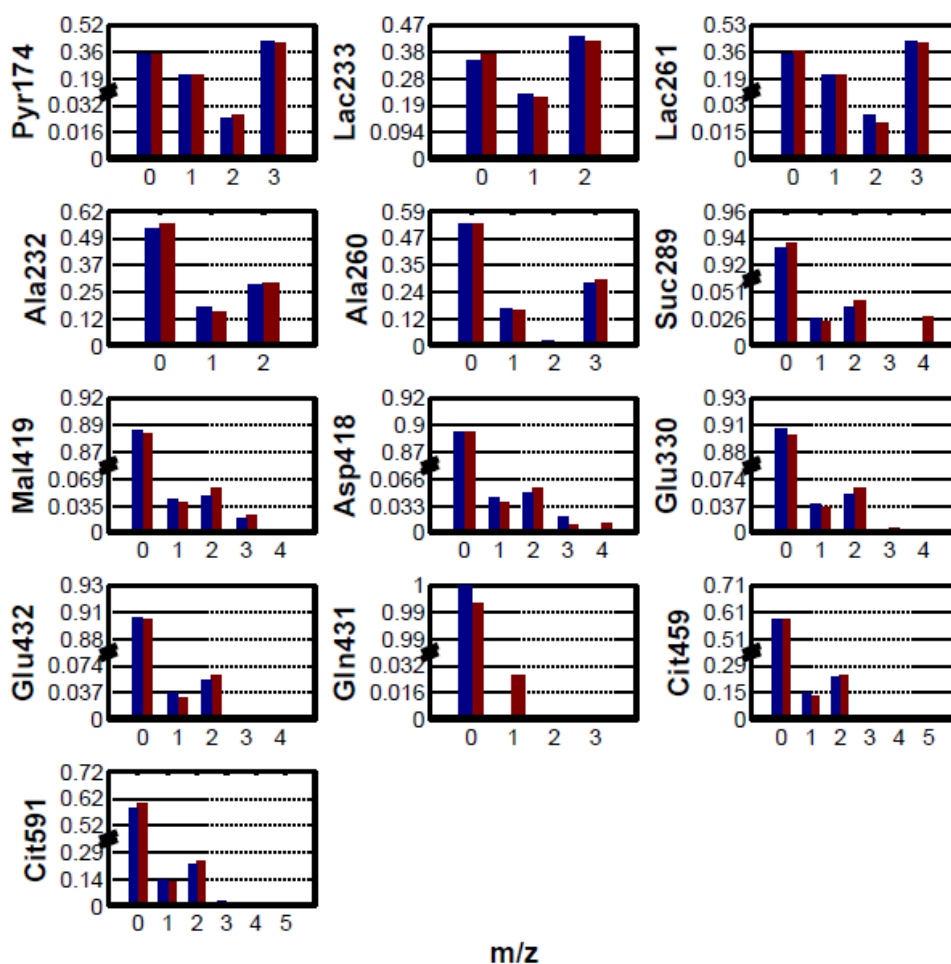

**Figure S11.** Simulated and measured MIDs from MFA in transformed NIH3T3 cells expressing oncogenic K-ras. Simulated values were obtained using Metran and the model fit (fluxes) listed in Table 1 and Supplementary Table 2. Cells were cultured as described in Methods using a 1:1 mixture of [U- $^{13}\text{C}_6$ ]glucose and [1- $^{13}\text{C}$ ]glucose. Metabolite labeling was quantified via GC/MS. MIDs are corrected for natural abundance.

## Supplementary References

Antoniewicz, M.R., Kelleher, J.K., and Stephanopoulos, G. (2007). Elementary metabolite units (EMU): a novel framework for modeling isotopic distributions. *Metab Eng* 9, 68-86.

Chatham, J.C., Bouchard, B., and Des Rosiers, C. (2003). A comparison between NMR and GCMS <sup>13</sup>C-isotopomer analysis in cardiac metabolism. *Mol Cell Biochem* 249, 105-112.

Maier, K., Hofmann, U., Reuss, M., and Mauch, K. (2008). Identification of metabolic fluxes in hepatic cells from transient <sup>13</sup>C-labeling experiments: Part II. Flux estimation. *Biotechnol Bioeng* 100, 355-370.

Metallo, C.M., Walther, J.L., and Stephanopoulos, G. (2009). Evaluation of <sup>13</sup>C isotopic tracers for metabolic flux analysis in mammalian cells. *J Biotechnol* 144, 167-174.

Munger, J., Bennett, B.D., Parikh, A., Feng, X.J., McArdle, J., Rabitz, H.A., Shenk, T., and Rabinowitz, J.D. (2008). Systems-level metabolic flux profiling identifies fatty acid synthesis as a target for antiviral therapy. *Nat Biotechnol*.

Noguchi, Y., Young, J.D., Aleman, J.O., Hansen, M.E., Kelleher, J.K., and Stephanopoulos, G. (2009). Effect of anaplerotic fluxes and amino acid availability on hepatic lipoapoptosis. *J Biol Chem* 284, 33425-33436.

Young, J.D., Walther, J.L., Antoniewicz, M.R., Yoo, H., and Stephanopoulos, G. (2008). An elementary metabolite unit (EMU) based method of isotopically nonstationary flux analysis. *Biotechnol Bioeng* 99, 686-699.

## Supplementary Tables

**Supplementary Table S1.** Summary of genes involved in glutamine metabolism and their correlation to specific pathways.

| <b>Glutathione Metabolism</b> | <b>Nucleotides Metabolism</b> | <b>Aspartate and Glutamate Metabolism</b> | <b>Amino sugar Metabolism</b> | <b>Nicotinate and nicotinamide metabolism</b> |
|-------------------------------|-------------------------------|-------------------------------------------|-------------------------------|-----------------------------------------------|
| Anpep                         | Adsl                          | Adsl                                      | Gfpt1                         | Enpep1                                        |
| Gclc                          | Adss                          | Adss                                      |                               | Enpe3                                         |
| Gclm                          | Cad                           | Cad                                       |                               |                                               |
| Ggta1                         | Ppat                          | Gfpt1                                     |                               |                                               |
| Gsr                           | Enpep1                        |                                           |                               |                                               |
| Gss                           | Enpep3                        |                                           |                               |                                               |
| Gstm1                         |                               |                                           |                               |                                               |
| Gstm2                         |                               |                                           |                               |                                               |
| Gstm5                         |                               |                                           |                               |                                               |
| Gstm7                         |                               |                                           |                               |                                               |
| Idh1                          |                               |                                           |                               |                                               |
| Mgst1                         |                               |                                           |                               |                                               |
| Mgst2                         |                               |                                           |                               |                                               |
| Mgst3                         |                               |                                           |                               |                                               |
| Srm                           |                               |                                           |                               |                                               |

Supplementary Table S2. MFA results in N and T cells using [U-13C5]glutamine tracer

|          | Normal | Lower bound<br>95% conf | Upper bound<br>95% conf | Transformed | Lower bound<br>95% conf | Upper bound<br>95% conf |                                                                            |
|----------|--------|-------------------------|-------------------------|-------------|-------------------------|-------------------------|----------------------------------------------------------------------------|
| R1       | 65.54  | 61.19                   | 69.89                   | 83.08       | 77.60                   | 88.63                   | Gluc.x -> G6P                                                              |
| R2 net   | 62.54  | 58.18                   | 66.90                   | 82.08       | 76.60                   | 87.63                   | G6P -> F6P                                                                 |
| R2 exch  | 4.08   | 0.00                    | Inf                     | 18.58       | 0.00                    | Inf                     | G6P <-> F6P                                                                |
| R3       | 64.21  | 59.86                   | 68.54                   | 82.41       | 76.94                   | 87.97                   | F6P -> DHAP + GAP                                                          |
| R4 net   | 64.21  | 59.86                   | 68.54                   | 82.41       | 76.94                   | 87.97                   | DHAP -> GAP                                                                |
| R4 exch  | 36.65  | 0.00                    | Inf                     | 13.11       | 0.00                    | Inf                     | DHAP <-> GAP                                                               |
| R5 net   | 129.20 | 120.60                  | 137.90                  | 165.00      | 154.00                  | 176.10                  | GAP -> 3PG                                                                 |
| R5 exch  | 0.00   | 0.00                    | Inf                     | 0.00        | 0.00                    | Inf                     | GAP <-> 3PG                                                                |
| R6       | 129.20 | 120.60                  | 137.90                  | 165.00      | 154.00                  | 176.10                  | 3PG -> Pyr.c                                                               |
| R7 net   | 114.90 | 105.90                  | 123.40                  | 158.10      | 146.90                  | 169.20                  | Pyr.c -> Lac                                                               |
| R7 exch  | 300.50 | 0.00                    | Inf                     | 9.23        | 0.00                    | Inf                     | Pyr.c <-> Lac                                                              |
| R8       | 114.90 | 105.90                  | 123.40                  | 158.10      | 146.90                  | 169.20                  | Lac -> Lac.x                                                               |
| R9 net   | 0.00   | 0.00                    | 0.00                    | 0.00        | 0.00                    | 0.00                    | DHAP -> GLP                                                                |
| R9 exch  | 75.86  | 0.00                    | Inf                     | 123.80      | 0.00                    | Inf                     | DHAP <-> GLP                                                               |
| R10 net  | 0.00   | 0.00                    | 0.00                    | 0.00        | 0.00                    | 0.00                    | GLP -> GLP.x                                                               |
| R10 exch | 23.88  | 0.00                    | Inf                     | 30.63       | 0.00                    | Inf                     | GLP <-> GLP.x                                                              |
| R11      | 3.00   | 2.71                    | 3.29                    | 1.00        | 0.90                    | 1.10                    | G6P -> 6PG                                                                 |
| R12      | 3.00   | 2.71                    | 3.29                    | 1.00        | 0.90                    | 1.10                    | 6PG -> P5P + CO2                                                           |
| R13 net  | 0.83   | 0.73                    | 0.93                    | 0.17        | 0.13                    | 0.20                    | P5P + P5P -> S7P + GAP                                                     |
| R13 exch | 25.51  | 0.00                    | Inf                     | 47.93       | 0.00                    | Inf                     | P5P + P5P <-> S7P + GAP                                                    |
| R14 net  | 0.83   | 0.73                    | 0.93                    | 0.17        | 0.13                    | 0.20                    | S7P + GAP -> F6P + E4P                                                     |
| R14 exch | 375.40 | 0.00                    | Inf                     | 184.30      | 0.00                    | Inf                     | S7P + GAP <-> F6P + E4P                                                    |
| R15 net  | 0.83   | 0.73                    | 0.93                    | 0.17        | 0.13                    | 0.20                    | P5P + E4P -> F6P + GAP                                                     |
| R15 exch | 40.29  | 0.00                    | Inf                     | 153.40      | 0.00                    | Inf                     | P5P + E4P <-> F6P + GAP                                                    |
| R16      | 0.00   | 0.00                    | 3.15                    | 0.00        | 0.00                    | 1.90                    | Pyr.m + CO2 -> Oac                                                         |
| R17 net  | 1.85   | 0.90                    | 5.86                    | 1.81        | 0.75                    | 4.72                    | Mal -> Pyr.m + CO2                                                         |
| R17 exch | 2.77   | 0.00                    | 3.19                    | 1.58        | 0.00                    | 1.89                    | Mal <-> Pyr.m + CO2                                                        |
| R18      | 16.09  | 13.50                   | 19.08                   | 8.58        | 7.65                    | 9.57                    | Pyr.m -> AcCoA.m + CO2                                                     |
| R19      | 16.09  | 13.50                   | 19.08                   | 8.58        | 7.65                    | 9.57                    | AcCoA.m + Oac -> Cit                                                       |
| R20 net  | 10.10  | 9.09                    | 11.15                   | 5.42        | 4.91                    | 5.97                    | Cit -> Akg + CO2                                                           |
| R20 exch | 3.29   | 2.67                    | 3.90                    | 3.67        | 3.22                    | 4.15                    | Cit <-> Akg + CO2                                                          |
| R21      | 12.13  | 10.57                   | 13.70                   | 7.41        | 6.12                    | 8.75                    | Akg -> Suc + CO2                                                           |
| R22 net  | 12.13  | 10.57                   | 13.70                   | 7.41        | 6.12                    | 8.75                    | Suc -> Fum                                                                 |
| R22 exch | 37.19  | 0.00                    | Inf                     | 0.00        | 0.00                    | 1.50                    | Suc <-> Fum                                                                |
| R23 net  | 12.13  | 10.57                   | 13.70                   | 7.41        | 6.12                    | 8.75                    | Fum -> Mal                                                                 |
| R23 exch | 0.00   | 0.00                    | Inf                     | 42250       | 1.49                    | Inf                     | Fum <-> Mal                                                                |
| R24 net  | 10.28  | 6.68                    | 11.33                   | 5.60        | 3.52                    | 6.15                    | Mal -> Oac                                                                 |
| R24 exch | 36.20  | 0.00                    | Inf                     | 57630       | 3.24                    | Inf                     | Mal <-> Oac                                                                |
| R25      | 5.99   | 3.38                    | 9.08                    | 3.16        | 2.37                    | 4.08                    | Cit -> AcCoA.c + Oac                                                       |
| R26      | 5.99   | 3.38                    | 9.08                    | 3.16        | 2.37                    | 4.08                    | AcCoA.c -> FA                                                              |
| R27      | 0.15   | 0.13                    | 0.16                    | 0.15        | 0.14                    | 0.17                    | Pyr.m + Glu -> Ala + Akg                                                   |
| R28      | 0.18   | 0.16                    | 0.20                    | 0.18        | 0.16                    | 0.20                    | Oac + Glu -> Asp + Akg                                                     |
| R29      | 20.32  | 18.94                   | 21.70                   | 16.05       | 14.85                   | 17.24                   | Gln.x -> Gln                                                               |
| R30      | 20.10  | 18.72                   | 21.49                   | 15.83       | 14.63                   | 17.01                   | Gln -> Glu                                                                 |
| R31      | 17.79  | 16.39                   | 19.19                   | 13.55       | 12.46                   | 14.65                   | Glu -> Glu.x                                                               |
| R32 net  | 1.70   | 0.75                    | 2.71                    | 1.66        | 0.60                    | 2.72                    | Glu -> Akg                                                                 |
| R32 exch | 168.10 | 115.20                  | 340.70                  | 202.20      | 105.90                  | 1895                    | Glu <-> Akg                                                                |
| R33      | 1.00   | 0.90                    | 1.10                    | 1.00        | 0.90                    | 1.10                    | 0.18*Asp + 0.28*Glu + 0.17*Ser + 0.11*Gly + 0.15*Ala + 0.22*Gln -> Biomass |
| R34      | 0.50   | 0.45                    | 0.55                    | 0.50        | 0.45                    | 0.55                    | P5P -> NTP                                                                 |
| R35 net  | 14.39  | 11.84                   | 17.10                   | 6.91        | 6.08                    | 7.74                    | Pyr.c -> Pyr.m                                                             |
| R35 exch | 74.00  | 39.37                   | 133.40                  | 275.80      | 86.53                   | 4566                    | Pyr.c <-> Pyr.m                                                            |
| R36      | 0.44   | 0.01                    | 0.86                    | 0.00        | 0.00                    | 1.00                    | 0*Pyr.c -> Pyr.mnt                                                         |
| R37      | 0.56   | 0.14                    | 0.99                    | 1.00        | 0.00                    | 1.00                    | 0*Pyr.m -> Pyr.mnt                                                         |
| R38      | 1.00   | 1.00                    | 1.00                    | 1.00        | 1.00                    | 1.00                    | Pyr.mnt -> Pyr.fix                                                         |
| R39      | 0.44   | 0.30                    | 0.46                    | 0.74        | 0.73                    | 0.76                    | Suc.dil -> Suc.mnt                                                         |
| R40      | 0.56   | 0.54                    | 0.70                    | 0.26        | 0.24                    | 0.27                    | 0*Suc -> Suc.mnt                                                           |
| R41      | 1.00   | 1.00                    | 1.00                    | 1.00        | 1.00                    | 1.00                    | Suc.mnt -> Suc.fix                                                         |
| R42      | 0.10   | 0.08                    | 0.12                    | 0.09        | 0.08                    | 0.11                    | Cit.dil -> Cit.mnt                                                         |
| R43      | 0.90   | 0.88                    | 0.92                    | 0.91        | 0.89                    | 0.92                    | 0*Cit -> Cit.mnt                                                           |
| R44      | 1.00   | 1.00                    | 1.00                    | 1.00        | 1.00                    | 1.00                    | Cit.mnt -> Cit.fix                                                         |

Net flux:  $(v_F - v_R)$  (→) and Exchange flux:  $\min(v_F, v_R)$  (↔)Fluxes are listed x  $10^{14}$  mol/(cell\*hr)

Supplementary Table S3. MFA results in N and T cells using a 1:1 mixture of [U-13C]glucose and [1-13C]glucose

|          | Normal   | Lower bound<br>95% conf | Upper bound<br>95% conf | Transformed | Lower bound<br>95% conf | Upper bound<br>95% conf |                                                                            |
|----------|----------|-------------------------|-------------------------|-------------|-------------------------|-------------------------|----------------------------------------------------------------------------|
| R1       | 56.87    | 50.37                   | 65.06                   | 80.32       | 74.81                   | 85.45                   | Gluc.x -> G6P                                                              |
| R2 net   | 53.68    | 47.23                   | 61.89                   | 79.32       | 73.81                   | 84.44                   | G6P -> F6P                                                                 |
| R2 exch  | 0.00     | 0.00                    | Inf                     | 0.00        | 0.00                    | Inf                     | G6P <-> F6P                                                                |
| R3       | 55.47    | 49.54                   | 63.66                   | 79.66       | 74.15                   | 84.78                   | F6P -> DHAP + GAP                                                          |
| R4 net   | 55.47    | 49.54                   | 63.66                   | 79.66       | 74.15                   | 84.78                   | DHAP -> GAP                                                                |
| R4 exch  | 80.61    | 0.00                    | Inf                     | 29.67       | 0.00                    | Inf                     | DHAP <-> GAP                                                               |
| R5 net   | 111.80   | 98.87                   | 128.20                  | 159.50      | 148.50                  | 169.70                  | GAP -> 3PG                                                                 |
| R5 exch  | 17.32    | 0.00                    | Inf                     | 0.00        | 0.00                    | Inf                     | GAP <-> 3PG                                                                |
| R6       | 111.80   | 98.87                   | 128.20                  | 159.50      | 148.50                  | 169.70                  | 3PG -> Pyr.c                                                               |
| R7 net   | 108.50   | 95.45                   | 125.80                  | 158.00      | 148.00                  | 169.20                  | Pyr.c -> Lac                                                               |
| R7 exch  | 268.60   | 0.00                    | Inf                     | 15.71       | 0.00                    | Inf                     | Pyr.c <-> Lac                                                              |
| R8       | 108.50   | 95.45                   | 125.80                  | 158.00      | 148.00                  | 169.20                  | Lac -> Lac.x                                                               |
| R9 net   | 0.00     | 0.00                    | 0.00                    | 0.00        | 0.00                    | 0.00                    | DHAP -> GLP                                                                |
| R9 exch  | 58.12    | 0.00                    | Inf                     | 112.70      | 0.00                    | Inf                     | DHAP <-> GLP                                                               |
| R10 net  | 0.00     | 0.00                    | 0.00                    | 0.00        | 0.00                    | 0.00                    | GLP -> GLP.x                                                               |
| R10 exch | 289.80   | 0.00                    | Inf                     | 123.00      | 0.00                    | Inf                     | GLP <-> GLP.x                                                              |
| R11      | 3.20     | 2.62                    | 3.66                    | 1.00        | 0.91                    | 1.10                    | G6P -> 6PG                                                                 |
| R12      | 3.20     | 2.62                    | 3.66                    | 1.00        | 0.91                    | 1.10                    | 6PG -> P5P + CO2                                                           |
| R13 net  | 0.90     | 0.70                    | 1.06                    | 0.17        | 0.13                    | 0.20                    | P5P + P5P -> S7P + GAP                                                     |
| R13 exch | 29630    | 0.00                    | Inf                     | 3738        | 0.00                    | Inf                     | P5P + P5P <-> S7P + GAP                                                    |
| R14 net  | 0.90     | 0.70                    | 1.06                    | 0.17        | 0.13                    | 0.20                    | S7P + GAP -> F6P + E4P                                                     |
| R14 exch | 0.00     | 0.00                    | 3.64                    | 4.78        | 0.00                    | Inf                     | S7P + GAP <-> F6P + E4P                                                    |
| R15 net  | 0.90     | 0.70                    | 1.06                    | 0.17        | 0.13                    | 0.20                    | P5P + E4P -> F6P + GAP                                                     |
| R15 exch | 3.28     | 0.08                    | 5.84                    | 0.00        | 7.85                    | 0.00                    | P5P + E4P <-> F6P + GAP                                                    |
| R16      | 1.29     | 0.00                    | 1.97                    | 0.00        | 0.92                    | 0.00                    | Pyr.m + CO2 -> Oac                                                         |
| R17 net  | 11.75    | 8.84                    | 13.59                   | 5.50        | 3.73                    | 7.87                    | Mal -> Pyr.m + CO2                                                         |
| R17 exch | 0.00     | 0.00                    | 2.02                    | 0.55        | 0.00                    | 0.93                    | Mal <-> Pyr.m + CO2                                                        |
| R18      | 13.64    | 12.23                   | 15.55                   | 6.87        | 6.30                    | 7.99                    | Pyr.m -> AcCoA.m + CO2                                                     |
| R19      | 13.64    | 12.23                   | 15.55                   | 6.87        | 6.30                    | 7.99                    | AcCoA.m + Oac -> Cit                                                       |
| R20 net  | 10.18    | 8.91                    | 11.96                   | 3.38        | 2.83                    | 4.42                    | Cit -> Akg + CO2                                                           |
| R20 exch | 1.17     | 0.00                    | 1.75                    | 2.37        | 0.00                    | 2.93                    | Cit <-> Akg + CO2                                                          |
| R21      | 20.82    | 18.21                   | 24.13                   | 9.05        | 7.00                    | 10.78                   | Akg -> Suc + CO2                                                           |
| R22 net  | 20.82    | 18.21                   | 24.13                   | 9.05        | 7.00                    | 10.78                   | Suc -> Fum                                                                 |
| R22 exch | 11.38    | 0.00                    | Inf                     | 9.57        | 0.00                    | Inf                     | Suc <-> Fum                                                                |
| R23 net  | 20.82    | 18.21                   | 24.13                   | 9.05        | 7.00                    | 10.78                   | Fum -> Mal                                                                 |
| R23 exch | 0.00     | 0.00                    | Inf                     | 0           | 0.00                    | Inf                     | Fum <-> Mal                                                                |
| R24 net  | 9.07     | 7.66                    | 12.12                   | 3.56        | 2.27                    | 4.60                    | Mal -> Oac                                                                 |
| R24 exch | 130.80   | 0.00                    | Inf                     | 34460       | 0.00                    | Inf                     | Mal <-> Oac                                                                |
| R25      | 3.46     | 2.78                    | 4.15                    | 3.49        | 3.16                    | 3.83                    | Cit -> AcCoA.c + Oac                                                       |
| R26      | 3.46     | 2.78                    | 4.15                    | 3.49        | 3.16                    | 3.83                    | AcCoA.c -> FA                                                              |
| R27      | 0.15     | 0.12                    | 0.18                    | 0.15        | 0.14                    | 0.16                    | Pyr.m + Glu -> Ala + Akg                                                   |
| R28      | 0.18     | 0.14                    | 0.21                    | 0.18        | 0.16                    | 0.20                    | Oac + Glu -> Asp + Akg                                                     |
| R29      | 24.79    | 21.99                   | 27.39                   | 18.33       | 16.82                   | 19.64                   | Gln.x -> Gln                                                               |
| R30      | 24.57    | 21.77                   | 27.17                   | 18.11       | 16.60                   | 19.42                   | Gln -> Glu                                                                 |
| R31      | 13.66    | 11.38                   | 16.18                   | 12.16       | 11.10                   | 13.35                   | Glu -> Glu.x                                                               |
| R32 net  | 10.64    | 8.88                    | 12.60                   | 5.68        | 3.92                    | 7.09                    | Glu -> Akg                                                                 |
| R32 exch | 40110000 | 500.60                  | Inf                     | 3408000     | 155.50                  | Inf                     | Glu <-> Akg                                                                |
| R33      | 0.99     | 0.80                    | 1.19                    | 1.00        | 0.90                    | 1.09                    | 0.18*Asp + 0.28*Glu + 0.17*Ser + 0.11*Gly + 0.15*Ala + 0.22*Gln -> Biomass |
| R34      | 0.50     | 0.40                    | 0.60                    | 0.50        | 0.45                    | 0.55                    | P5P -> NTP                                                                 |
| R35 net  | 3.33     | 1.73                    | 5.25                    | 1.52        | 0.01                    | 2.74                    | Pyr.c -> Pyr.m                                                             |
| R35 exch | 27.30    | 19.56                   | 35.00                   | 9.45        | 5.85                    | 14                      | Pyr.c <-> Pyr.m                                                            |
| R36      | 1.00     | 0.93                    | 1.00                    | 0.98        | 0.92                    | 1.00                    | 0*Pyr.c -> Pyr.mnt                                                         |
| R37      | 0.00     | 0.00                    | 0.07                    | 0.02        | 0.00                    | 0.08                    | 0*Pyr.m -> Pyr.mnt                                                         |
| R38      | 1.00     | 1.00                    | 1.00                    | 1.00        | 1.00                    | 1.00                    | Pyr.mnt -> Pyr.fix                                                         |
| R39      | 0.21     | 0.12                    | 0.31                    | 0.32        | 0.14                    | 0.49                    | Suc.dil -> Suc.mnt                                                         |
| R40      | 0.79     | 0.69                    | 0.88                    | 0.68        | 0.51                    | 0.86                    | 0*Suc -> Suc.mnt                                                           |
| R41      | 1.00     | 1.00                    | 1.00                    | 1.00        | 1.00                    | 1.00                    | Suc.mnt -> Suc.fix                                                         |
| R42      | 0.00     | 0.00                    | 0.08                    | 0.00        | 0.00                    | 0.22                    | Cit.dil -> Cit.mnt                                                         |
| R43      | 1.00     | 0.92                    | 1.00                    | 1.00        | 0.78                    | 1.00                    | 0*Cit -> Cit.mnt                                                           |
| R44      | 1.00     | 1.00                    | 1.00                    | 1.00        | 1.00                    | 1.00                    | Cit.mnt -> Cit.fix                                                         |

Net flux:  $(v_F - v_R)$  (→) and Exchange flux:  $\min(v_F, v_R)$  (↔)Fluxes are listed x  $10^{14}$  mol/(cell\*hr)

Supplementary Table S4. MFA results in MDA-MB-231 cells using [U-13C5]glutamine

|          | Normal   | Lower bound<br>95% conf | Upper bound<br>95% conf |                                                                            |
|----------|----------|-------------------------|-------------------------|----------------------------------------------------------------------------|
| R1       | 232.00   | 216.70                  | 247.30                  | Gluc.x -> G6P                                                              |
| R2 net   | 172.10   | 156.00                  | 188.30                  | G6P -> F6P                                                                 |
| R2 exch  | 99.07    | 0.00                    | Inf                     | G6P <-> F6P                                                                |
| R3       | 211.40   | 196.00                  | 226.70                  | F6P -> DHAP + GAP                                                          |
| R4 net   | 211.40   | 196.00                  | 226.70                  | DHAP -> GAP                                                                |
| R4 exch  | 0.00     | 0.00                    | Inf                     | DHAP <-> GAP                                                               |
| R5 net   | 442.40   | 411.80                  | 473.00                  | GAP -> 3PG                                                                 |
| R5 exch  | 0.00     | 0.00                    | Inf                     | GAP <-> 3PG                                                                |
| R6       | 442.40   | 411.80                  | 473.00                  | 3PG -> Pyr.c                                                               |
| R7 net   | 420.70   | 390.20                  | 451.30                  | Pyr.c -> Lac                                                               |
| R7 exch  | 0.00     | 0.00                    | Inf                     | Pyr.c <-> Lac                                                              |
| R8       | 420.70   | 390.20                  | 451.30                  | Lac -> Lac.x                                                               |
| R9 net   | 0.00     | 0.00                    | 0.00                    | DHAP -> GLP                                                                |
| R9 exch  | 66.89    | 0.00                    | Inf                     | DHAP <-> GLP                                                               |
| R10 net  | 0.00     | 0.00                    | 0.00                    | GLP -> GLP.x                                                               |
| R10 exch | 116.40   | 0.00                    | Inf                     | GLP <-> GLP.x                                                              |
| R11      | 59.97    | 54.09                   | 65.84                   | G6P -> 6PG                                                                 |
| R12      | 59.97    | 54.09                   | 65.84                   | 6PG -> P5P + CO2                                                           |
| R13 net  | 19.66    | 17.74                   | 21.60                   | P5P + P5P -> S7P + GAP                                                     |
| R13 exch | 49       | 0.00                    | Inf                     | P5P + P5P <-> S7P + GAP                                                    |
| R14 net  | 19.66    | 17.74                   | 21.60                   | S7P + GAP -> F6P + E4P                                                     |
| R14 exch | 20.35    | 0.00                    | Inf                     | S7P + GAP <-> F6P + E4P                                                    |
| R15 net  | 19.66    | 17.74                   | 21.60                   | P5P + E4P -> F6P + GAP                                                     |
| R15 exch | 306.70   | 0.00                    | Inf                     | P5P + E4P <-> F6P + GAP                                                    |
| R16      | 2.92     | 2.61                    | 3.22                    | Pyr.m + CO2 -> Oac                                                         |
| R17 net  | 0.54     | 0.20                    | 2.02                    | Mal -> Pyr.m + CO2                                                         |
| R17 exch | 0.00     | 0.00                    | 0.30                    | Mal <-> Pyr.m + CO2                                                        |
| R18      | 17.97    | 16.93                   | 18.98                   | Pyr.m -> AcCoA.m + CO2                                                     |
| R19      | 17.97    | 16.93                   | 18.98                   | AcCoA.m + Oac -> Cit                                                       |
| R20 net  | 7.70     | 7.10                    | 8.07                    | Cit -> Akg + CO2                                                           |
| R20 exch | 3.81     | 3.33                    | 4.56                    | Cit <-> Akg + CO2                                                          |
| R21      | 6.28     | 5.37                    | 6.88                    | Akg -> Suc + CO2                                                           |
| R22 net  | 6.28     | 5.37                    | 6.88                    | Suc -> Fum                                                                 |
| R22 exch | 0.15     | 0.00                    | 6.78                    | Suc <-> Fum                                                                |
| R23 net  | 6.28     | 5.37                    | 6.88                    | Fum -> Mal                                                                 |
| R23 exch | 1.00E+09 | 5.60E+06                | Inf                     | Fum <-> Mal                                                                |
| R24 net  | 5.73     | 5.11                    | 6.30                    | Mal -> Oac                                                                 |
| R24 exch | 46.08    | 34.42                   | 71.56                   | Mal <-> Oac                                                                |
| R25      | 10.27    | 9.46                    | 11.21                   | Cit -> AcCoA.c + Oac                                                       |
| R26      | 10.27    | 9.46                    | 11.21                   | AcCoA.c -> FA                                                              |
| R27      | 1.32     | 0.08                    | 2.48                    | Pyr.m + Glu -> Ala + Akg                                                   |
| R28      | 0.95     | 0.10                    | 1.79                    | Oac + Glu -> Asp + Akg                                                     |
| R29      | 30.61    | 28.82                   | 32.91                   | Gln.x -> Gln                                                               |
| R30      | 29.45    | 28.17                   | 30.98                   | Gln -> Glu                                                                 |
| R31      | 29.39    | 26.69                   | 32.08                   | Glu -> Glu.x                                                               |
| R32 net  | -1.42    | -2.00                   | -1.10                   | Glu -> Akg                                                                 |
| R32 exch | 995      | 322.90                  | Inf                     | Glu <-> Akg                                                                |
| R33      | 5.30     | 0.32                    | 9.93                    | 0.18*Asp + 0.28*Glu + 0.17*Ser + 0.11*Gly + 0.15*Ala + 0.22*Gln -> Biomass |
| R34      | 1.00     | 0.90                    | 1.10                    | P5P -> NTP                                                                 |
| R35 net  | 21.67    | 19.66                   | 23.99                   | Pyr.c -> Pyr.m                                                             |
| R35 exch | 0.00     | 0.00                    | 18.92                   | Pyr.c <-> Pyr.m                                                            |
| R36      | 0.21     | 0.00                    | 0.86                    | 0*Pyr.c -> Pyr.mnt                                                         |
| R37      | 0.79     | 0.14                    | 1.00                    | 0*Pyr.m -> Pyr.mnt                                                         |
| R38      | 1.00     | 1.00                    | 1.00                    | Pyr.mnt -> Pyr.fix                                                         |
| R39      | 0.82     | 0.80                    | 0.83                    | Suc.dil -> Suc.mnt                                                         |
| R40      | 0.19     | 0.17                    | 0.20                    | 0*Suc -> Suc.mnt                                                           |
| R41      | 1.00     | 1.00                    | 1.00                    | Suc.mnt -> Suc.fix                                                         |
| R42      | 0.71     | 0.70                    | 0.73                    | Cit.dil -> Cit.mnt                                                         |
| R43      | 0.29     | 0.27                    | 0.30                    | 0*Cit -> Cit.mnt                                                           |
| R44      | 1.00     | 1.00                    | 1.00                    | Cit.mnt -> Cit.fix                                                         |

Net flux:  $(v_F - v_R)$  ( $\rightarrow$ ) and Exchange flux:  $\min(v_F, v_R)$  ( $\leftrightarrow$ )Fluxes are listed  $\times 10^{14}$  mol/(cell\*hr)
